# Supplementary material for: GABRB3 mutations: a new and emerging cause of early infantile epileptic encephalopathy
Source: PubMed Central journal article supplement (PMC4864756; doi:10.1111/dmcn.12976), 2015-12-09
Supplement: DMCN-58-416-s001.pdf [file DMCN-58-416-s001.pdf]

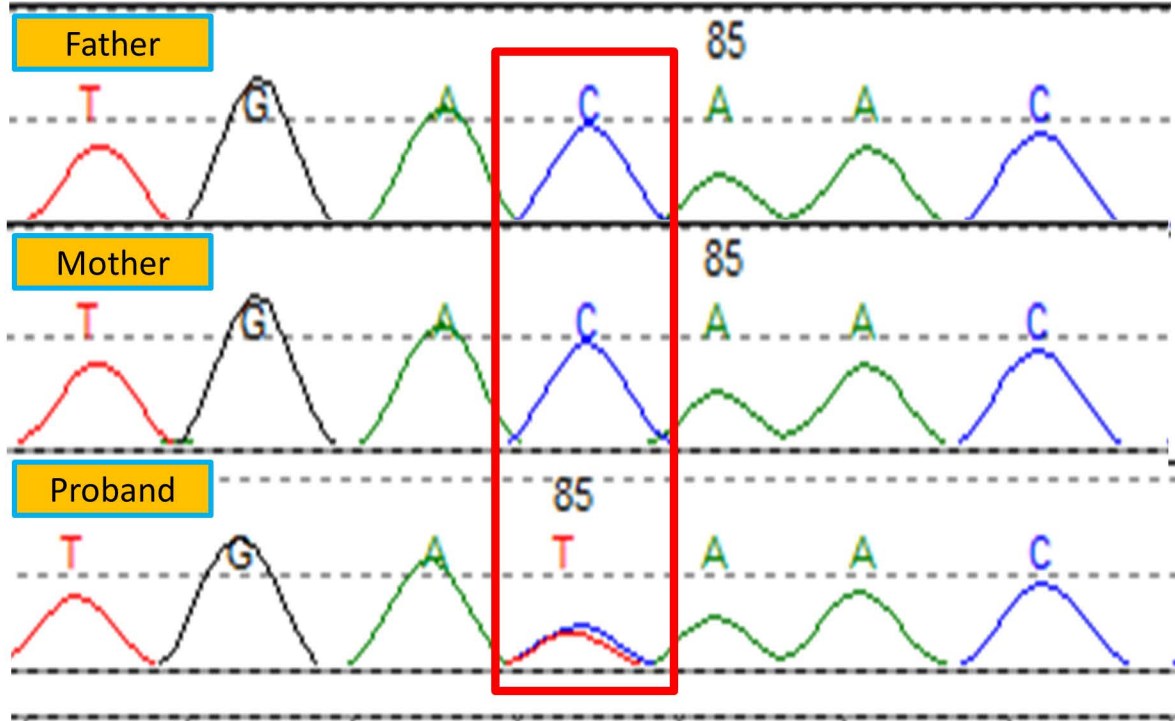

|                       |     |                                                             |     |
|-----------------------|-----|-------------------------------------------------------------|-----|
| <i>H.sapiens</i>      | 263 | VSFWINYDASAARVALGITTVLMT <b>T</b> TINHLRETLPKIPYVKAIDMYLMG  | 312 |
| <i>P.troglodytes</i>  | 263 | VSFWINYDASAARVALGITTVLMT <b>T</b> TINHLRETLPKIPYVKAIDMYLMG  | 312 |
| <i>M.mulatta</i>      | 263 | VSFWINYDASAARVALGITTVLMT <b>T</b> TINHLRETLPKIPYVKAIDMYLMG  | 312 |
| <i>C.lupus</i>        | 241 | VSFWINYDASAARVALGITTVLMT <b>T</b> TINHLRETLPKIPYVKAIDMYLMG  | 290 |
| <i>B.taurus</i>       | 263 | VSFWINYDASAARVALGITTVLMT <b>T</b> TINHLRETLPKIPYVKAIDMYLMG  | 312 |
| <i>M.musculus</i>     | 263 | VSFWINYDASAARVALGITTVLMT <b>T</b> TINHLRETLPKIPYVKAIDMYLMG  | 312 |
| <i>R.norvegicus</i>   | 263 | VSFWINYDASAARVALGITTVLMT <b>T</b> TINHLRETLPKIPYVKAIDMYLMG  | 312 |
| <i>G.gallus</i>       | 263 | VSFWINYDASAARVALGITTVLMT <b>T</b> TINHLRETLPKIPYVKAIDMYLMG  | 312 |
| <i>D.rerio</i>        | 263 | VSFWINYDASAARVALGITTVLMT <b>T</b> TINHLRETLPKIPYVKAIDMYLMG  | 312 |
| <i>D.melanogaster</i> | 276 | VSFWINHEATSARVALGITTVLMT <b>T</b> TISTGVRSSLPRISYVKAIDIYLMV | 325 |
| <i>A.gambiae</i>      | 254 | VSFWINHEATSARVALGITTVLMT <b>T</b> TISTGVRSSLPRISYVKAIDIYLMV | 303 |
| <i>C.elegans</i>      | 281 | VSFWINHEATSARVALGITTVLMT <b>T</b> TISTGVRQSLPRISYVKSIDIYLMV | 330 |
| <i>X.tropicalis</i>   | 263 | VSFWINYDASAARVALGITTVLMT <b>T</b> TINHLRETLPKIPYVKAIDMYLMG  | 312 |
